# Supplementary material for: Synthesis and biological evaluation of 4-(1H-1,2,4-triazol-1-yl)benzoic acid hybrids as anticancer agents
Source: PubMed Central journal article supplement — RSC Adv. 2019 Jun 17;9(33):19065–74. doi: 10.1039/c9ra03151k (PMC9064907; doi:10.1039/c9ra03151k), 2019-06-17
Supplement: RA-009-C9RA03151K-s001.pdf [file RA-009-C9RA03151K-s001.pdf]

## 1. 2D QSAR analysis

Table 1S: Experimental and estimated activity of training and test set compounds **1-17**

| Cpds.        | pIC50_MCF-7 | \$PRED_MCF7 | pIC50_RPE-1 | \$PRED_RPE-1 | pIC50_HCT-116 | \$PRED_HCT-116 |
|--------------|-------------|-------------|-------------|--------------|---------------|----------------|
| Training set |             |             |             |              |               |                |
| 1            | 4.483       | 4.482       | 4.379       | 4.413        | 4.215         | 4.185          |
| 2            | 4.728       | 4.725       | 4.59        | 4.586        | 4.213         | 4.24           |
| 4            | 4.564       | 4.571       | 4.453       | 4.462        | 4.257         | 4.207          |
| 5            | 4.699       | 4.697       | 4.62        | 4.574        | 4.22          | 4.269          |
| 7            | 4.532       | 4.53        | 4.526       | 4.526        | 4.214         | 4.223          |
| 8            | 4.506       | 4.562       | 4.461       | 4.49         | 4.154         | 4.224          |
| 10           | 4.519       | 4.519       | 4.472       | 4.416        | 4.131         | 4.163          |
| 11           | 4.561       | 4.562       | 4.48        | 4.526        | 4.233         | 4.158          |
| 13           | 4.631       | 4.632       | 4.521       | 4.495        | 4.194         | 4.207          |
| 14           | 4.807       | 4.809       | 4.548       | 4.595        | 4.339         | 4.285          |
| 15           | 4.619       | 4.616       | 4.622       | 4.599        | 4.038         | 4.078          |
| 16           | 4.631       | 4.631       | 4.428       | 4.413        | 4.408         | 4.425          |
| 17           | 4.659       | 4.661       | 4.466       | 4.456        | 4.314         | 4.311          |
|              |             |             |             |              |               |                |
| Test set     |             |             |             |              |               |                |
| 3            | 4.622       | 4.562       | 4.444       | 4.49         | 4.358         | 4.344          |
| 6            | 4.504       | 4.505       | 4.425       | 4.435        | 4.226         | 4.215          |
| 9            | 4.458       | 4.457       | 4.408       | 4.418        | 4.167         | 4.18           |
| 12           | 4.666       | 4.666       | 4.572       | 4.551        | 4.202         | 4.239          |
| Doxorubicin  | 4.706       | 6.132       | 4.646       | 4.759        | 4.194         | 4.655          |

Table 2S : the Z-score of the target products 1-17

|             | \$Z\$-SCORE_mcf7 | \$Z\$-SCORE_hct116 | \$Z\$-SCORE_RPE-1 |
|-------------|------------------|--------------------|-------------------|
| 1           | 0.01697637       | 1.1130153          | 0.83677042        |
| 2           | 0.17487699       | 0.13405564         | 0.76464283        |
| 3           | 2.9849298        | 1.4903405          | 0.3782531         |
| 4           | 0.3379592        | 0.27857989         | 1.4105554         |
| 5           | 0.077910095      | 1.4892653          | 1.3610055         |
| 6           | 0.030910673      | 0.32741761         | 0.31407404        |
| 7           | 0.069427371      | 0.007662103        | 0.25124091        |
| 8           | 2.8025138        | 0.0125             | 0.2135            |
| 9           | 0.053574778      | 0.3254143          | 0.3659147         |
| 10          | 0.043049004      | 1.8405719          | 0.91687667        |
| 11          | 0.082863122      | 1.5014175          | 2.118978          |
| 12          | 0.047065146      | 0.68167078         | 1.045627          |
| 13          | 0.082238495      | 0.86612308         | 0.34462792        |
| 14          | 0.099830285      | 1.5083652          | 1.5342196         |
| 15          | 0.20771068       | 0.73322046         | 1.1331122         |
| 16          | 0.013874196      | 0.4984839          | 0.4962976         |
| 17          | 0.072850548      | 0.30882126         | 0.086494915       |
| Doxorubicin |                  |                    |                   |

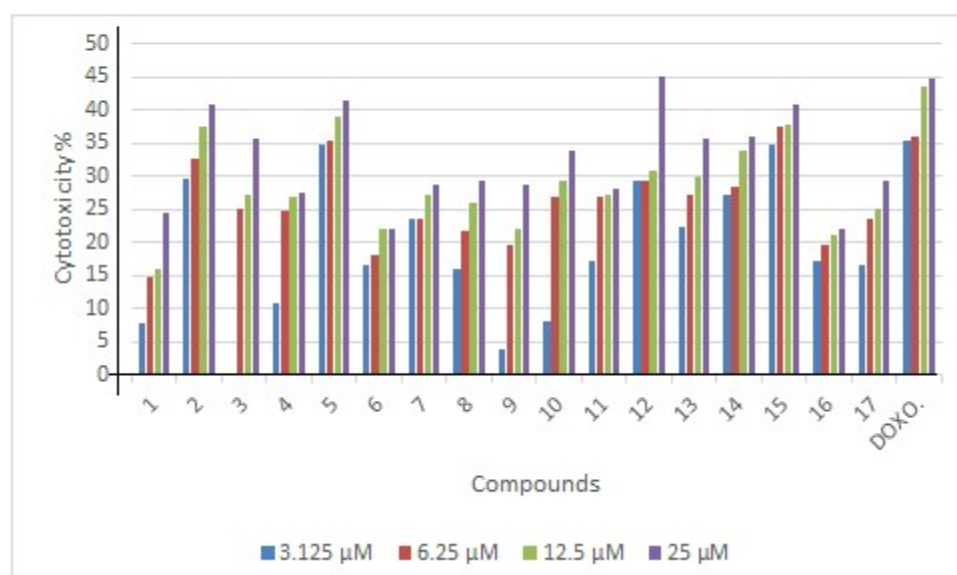

**Fig. S1** Dose-dependent cytotoxic activities of 1-17 against HCT-116 cancer cells as depicted by the MTT assay.

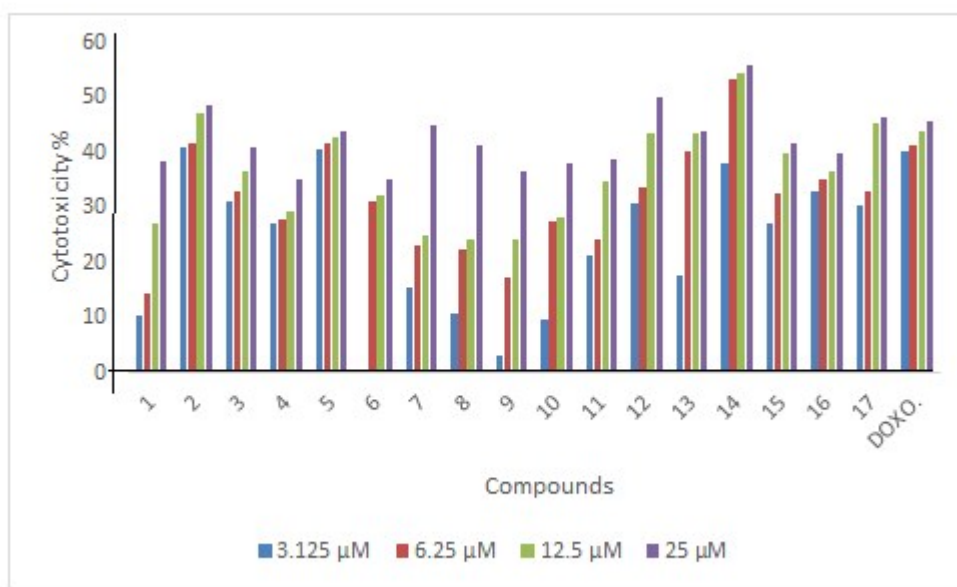

**Fig. S2** Dose-dependent cytotoxic activities of 1–17 against MCF-7 cancer cells as depicted by the MTT assay.

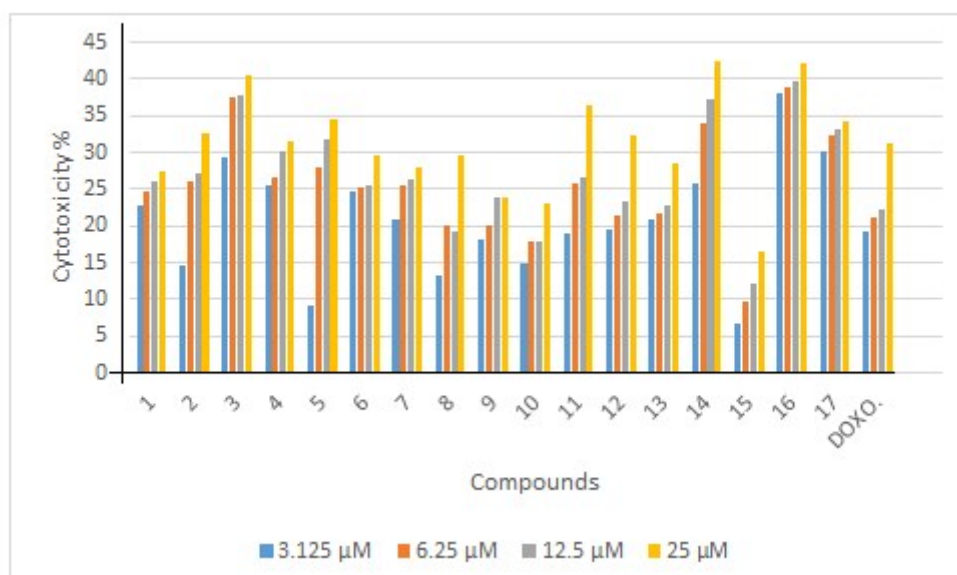

**Fig. S3** Dose-dependent cytotoxic activities of 1–17 against RPE-1 normal cells as depicted by the MTT assay.
